# Supplementary material
Source: PubMed Central journal article supplement (PMC2917106)
Supplement: NIHMS223159-supplement-1.pdf [file NIHMS223159-supplement-1.pdf]

# The structures of the anti-tuberculosis antibiotics viomycin and capreomycin bound to the 70S ribosome

Robin E. Stanley<sup>1,2\*</sup>, Gregor Blaha<sup>1\*</sup>, Robert L. Grodzicki<sup>1,3</sup>, Michael D. Strickler<sup>1,3</sup>, & Thomas A. Steitz<sup>1,3,4</sup>

<sup>1</sup>*Department of Molecular Biophysics and Biochemistry, Yale University, New Haven, CT 06520, USA.*

<sup>2</sup>*Present address: Laboratory of Molecular Biology, NIDDK, NIH, Bethesda, Maryland 20892, USA.*

<sup>3</sup>*Howard Hughes Medical Institute, New Haven, CT 06520, USA*

<sup>4</sup>*Department of Chemistry, Yale University, New Haven CT 06520, USA*

*\* These authors contributed equally to this work*

Correspondence to: Thomas A. Steitz e-mail: [thomas.steitz@yale.edu](mailto:thomas.steitz@yale.edu)

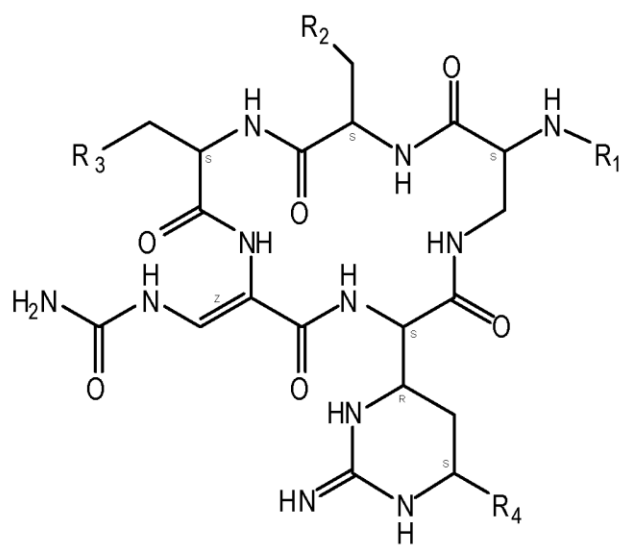

| Antibiotic         | R <sub>1</sub> | R <sub>2</sub> | R <sub>3</sub>   | R <sub>4</sub> |
|--------------------|----------------|----------------|------------------|----------------|
| Viomycin           |                | -OH            | -OH              | -OH            |
| Tuberactinomycin A |                | -OH            | -OH              | -OH            |
| Tuberactinomycin B |                | -OH            | -OH              | -OH            |
| Tuberactinomycin N |                | -OH            | -OH              | -H             |
| Tuberactinomycin O |                | -OH            | -OH              | -H             |
| Tuberactinamine    | -H             | -OH            | -OH              | -H             |
| Capreomycin IA     | -H             | -OH            |                  | -H             |
| Capreomycin IB     | -H             | -H             |                  | -H             |
| Capreomycin IIA    | -H             | -OH            | -NH <sub>2</sub> | -H             |
| Capreomycin IIB    | -H             | -H             | -NH <sub>2</sub> | -H             |

**Supplemental figure 1:** chemical structure of naturally occurring tuberactinomycins.

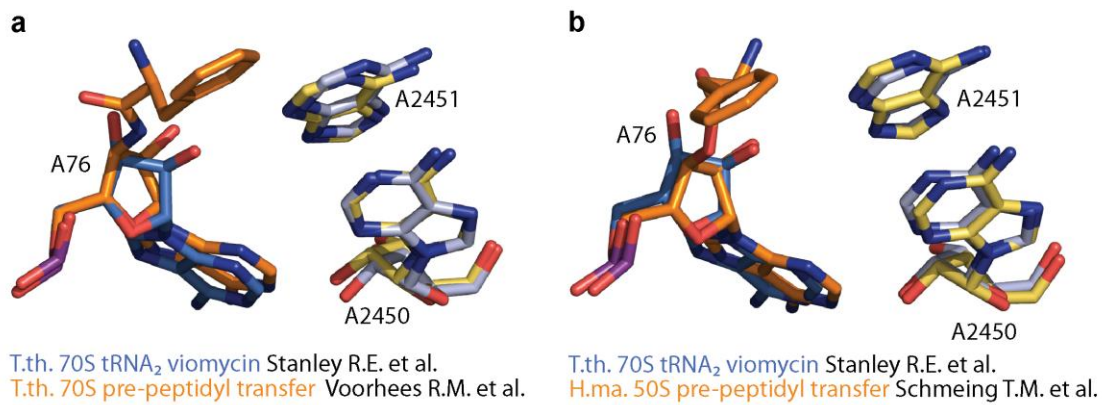

**Supplemental figure 2:** Comparison of the relative positions of A2450 and A2451 of the 23S rRNA to the A76 of a P-site substrate from structures of different ribosomal complexes. All structures were superimposed on the peptidyl transferase centre as defined by residues 2049-2074, 2244-2261, 2435-2466, 2484-2520, and 2545-2619 of 23S rRNA. (a) Comparison between *T.th.* 70S complex of a pre-peptidyl transfer reaction from the structure of Ramakrishnan and co-workers (2WDL and 2WDK)<sup>12</sup> and the viomycin structure reported here. Residues of 23S rRNA are in gold and gray, the terminal residue of the P-site tRNA is in orange and blue, for the complex of the pre-peptidyl transfer reaction and for the viomycin complex, respectively.

(b) Comparison between the structure of a *H.ma.* 50S complex of a pre-peptidyl transfer reaction (1VQN)<sup>11</sup> and the viomycin structure reported here. Residues of 23S rRNA are in gold and gray, the terminal residue of the P-site tRNA is in orange and blue, for the complex of the pre-peptidyl transfer reaction and for the viomycin complex, respectively.
